# Supplementary material for: Multi-color electrochromism containing green color based on electrochemically polymerized star-shaped phenyl bithiophene
Source: Royal Society of Chemistry journal article supplement (doi:10.1039/c8cp00338f), 2018-01-01
Supplement: c8cp00338f1.pdf [file c8cp00338f1.pdf]

## Multi-color Electrochromism Containing Green Color Based on Electrochemically Polymerized Star-Shaped Phenyl Bithiophene

Yujie Dong, Feifei Luo, Lan Chen, Feiya Yuan, Yuejiao Hou, Weijun Li, Shuanma Yan,  
Yuyu Dai, Mi Ouyang\*, Cheng Zhang\*

State Key Laboratory Breeding Base of Green Chemistry Synthesis Technology, College of  
Chemical Engineering, Zhejiang University of Technology, 310014, Hangzhou, China

Email: [c Zhang@zjut.edu.cn](mailto:c Zhang@zjut.edu.cn); [ouyang@zjut.edu.cn](mailto:ouyang@zjut.edu.cn)

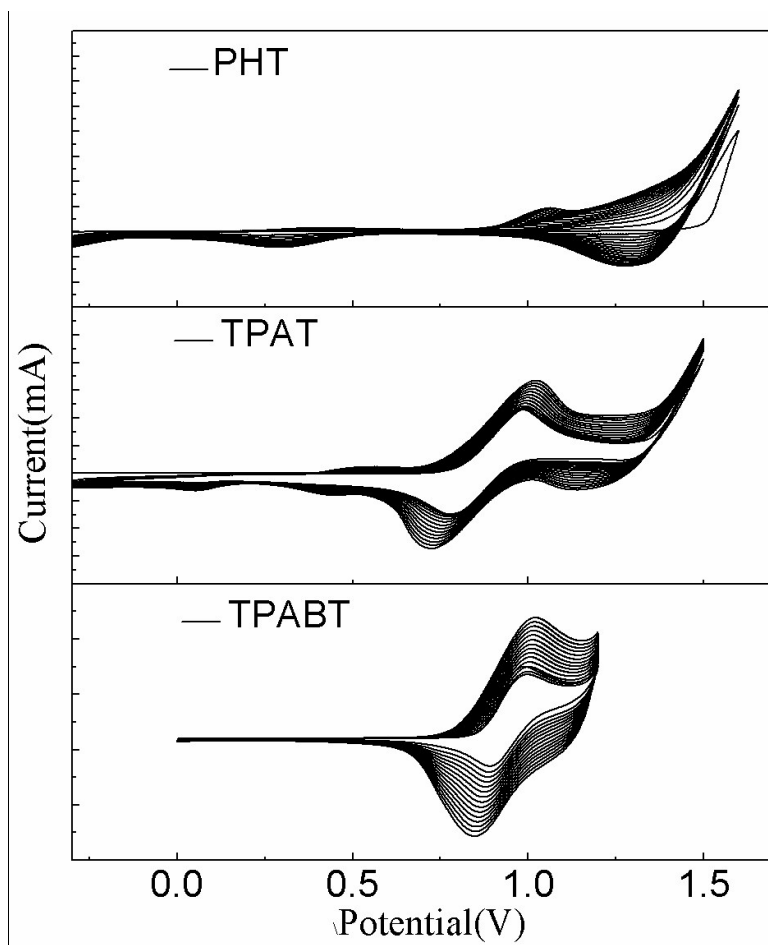

Figure S1. The cyclic voltammetry curves of the electrochemical polymerization process for PHT, TPAT and TPABT.

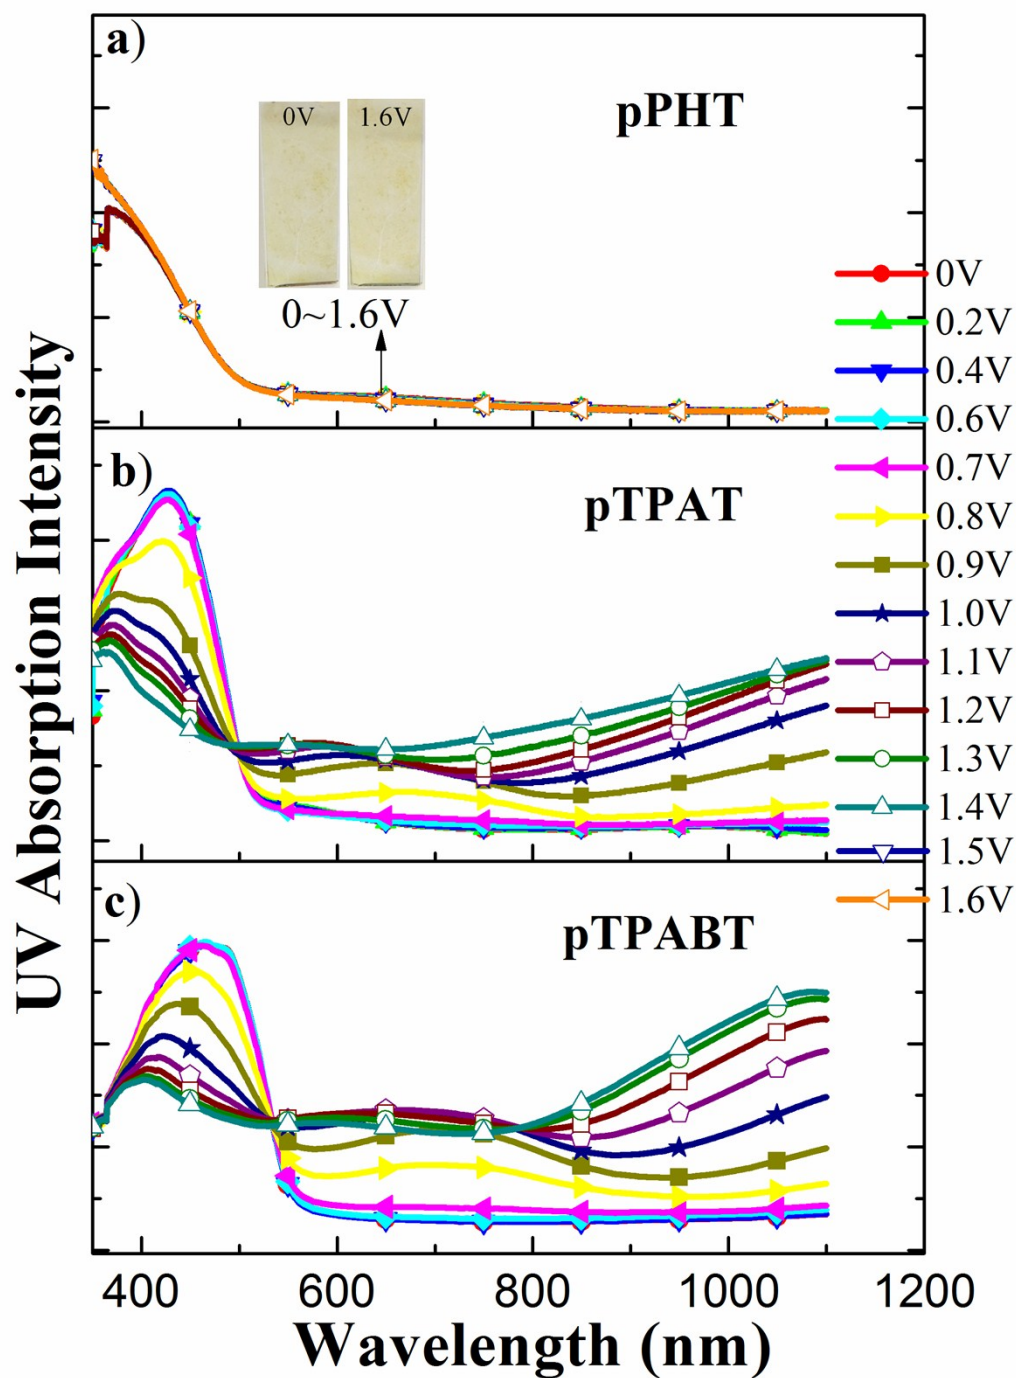

Figure S2. The UV absorption spectra under different voltages between 0V and 1.6V for the polymer pPHT, pTPAT and pTPABT in the electrochemical cell; inset are the film photo of pPHT under different voltages.
